# Supplementary material for: Quantitative assessment of acetabular bone defects: A study of 50 computed tomography data sets
Source: PLoS One. 2019 Oct 17;14(10):e0222511. doi: 10.1371/journal.pone.0222511 (PMC6797127; doi:10.1371/journal.pone.0222511)
Supplement: S2 File — In columns A and B, the case numbers (1 to 50) alongside with the internal identifiers are listed. In column C to D, the length and width of the defect acetabulum are listed, which is transferred to a ratio representing the ovality in columns E and F. In column G, the LCE angles are listed. In columns H to N, the total implant migration, migration in medial-lateral, anterior-posterior, and cranial-distal direction in mm are listed. Grey filling indicates that it was not possible to measure implant migration due to the fact that there was no segmentable implant present in the corresponding CT data. In columns O to R, the existence of wall defects in each sector is indicated by “1” in the corresponding column, whereas an intact wall is indicated by “0”. (XLSX) [file pone.0222511.s002.xlsx]

## Sheet: SUMMARY
		Ovality				LCE angle	Implant migration							Wall defect
						[°]		Direction						0 = intact ; 1 = defect
	Hemipelvis	Length	Width	Ratio			Distance (mm)	Medial	Lateral	Anterior	Posterior	Cranial	Distal	Cranial	Anterior	Posterior	Medial
1	01_Rizz_ri	26.3	21.6	1.21759	1	44.995	13.124	9.065			5.866	7.461		1	1	1	1
2	01_Rizz_le	29	21	1.38095	1	31.259	32.764	20.274		9.667		23.854		1	1	0	1
3	01_Ll_le	37.352	31.362	1.191	1	23.267	26.133	6.437		0.709		25.318		1	1	1	0
4	01_LMU_le	44	30.128	1.46044	1	20.346	51.726		12.905		37.902	32.749		1	0	1	1
5	02_LMU_le	28	21.249	1.31771	1	39.623	27.39		1.229		20.942	17.611		1	1	1	0
6	02_Rizz_le	36.058	30	1.20193	1	20.716	24.352	5.272			13.153	19.804		1	1	1	1
7	03_LMU_le	45	33	1.36364	1	20.712	38.376		12.897		3.41	35.983		1	1	1	0
8	03_LMU_ri	45	30.663	1.46757	1	23.488	37.315	3.994			19.926	31.295		1	1	1	0
9	03_Rizz_le	27	25.307	1.0669	1	29.56	27.213		6.797	7.89		25.142		1	1	0	1
10	03_Rizz_ri	34	25	1.36	1	43.15								1	1	1	1
11	04_Ll_le	42	31	1.35484	1	19.542	53.532		39.601		13.64	33.339		1	0	1	1
12	04_Rizz_le	34.175	29.5	1.15847	1	39.915	17.325		2.374		5.256	16.337		1	0	1	0
13	06_LMU_le	40.419	29.424	1.37367	1	48.682								1	1	1	1
14	07_Ll_ri	32	29	1.10345	1	20.736	12.401		3.393	2.185		11.726		1	1	1	0
15	07_LMU_le	36	33	1.09091	1	11.968	31.487		19.488		17.524	17.451		1	1	1	1
16	07_Rizz_le	29.91	23.5	1.27277	1	38.826								1	0	0	0
17	07_Wrzb_le	33.444	29.02	1.15245	1	45.843	15.856	0.563			9.307	12.825		1	0	1	0
18	08_Wrzb_le	33.5	25.462	1.31569	1	27.855	26.549	0.906			25.209	8.281		1	0	1	1
19	09_LMU_ri	25.866	24.827	1.04185	1	36.145	14.441	10.62			1.684	9.64		0	1	0	1
20	10_Rizz_ri	31.632	30.062	1.05223	1	44.597								0	0	0	0
21	11_Wrzb_le	39.004	24.219	1.61047	1	36.634	37.016		2.01	0.968		36.949		1	1	1	1
22	12_LMU_ri	34	30.092	1.12987	1	37.005								1	1	0	0
23	12_Wrzb_le	35	28.031	1.24862	1	38.796	9.001	8.688		0.112			2.347	1	1	1	1
24	13_LMU_ri	36.583	29.214	1.25224	1	28.065	19.353		1.872		11.186	15.681		1	1	1	0
25	14_LMU_le	34.5	29	1.18966	1	37.854	36.181	11.61		2.793		34.154		1	1	1	1
26	17_LMU_ri	33	30.251	1.09087	1	19.29								1	1	1	0
27	20_LMU_ri	42.17	26	1.62192	1	29.136								1	1	0	0
28	26_LMU_le	30	29.043	1.03295	1	63.028	8.738		6.959		2.262		4.775	1	1	1	1
29	28_LMU_ri	31	25.865	1.19853	1	26.249								1	0	1	0
30	30_LMU_le	41	25.655	1.59813	1	21.54								1	1	1	0
31	31_LMU_le	47	33	1.42424	1	34.42								1	1	1	0
32	32_LMU_ri	25.938	22.161	1.17043	1	53.051	18.226	14.336		0.878		11.221		0	1	0	1
33	37_LMU_ri	42.742	25.831	1.65468	1	34.169								1	1	1	1
34	38_LMU_le	38.918	30.875	1.2605	1	26.023								1	1	1	1
35	17_Wrzb_ri	34	27	1.25926	1	21.223	26.102		8.395		18.038	16.896		1	0	1	0
36	36_LMU_ri	33	24.054	1.37191	1	42.723	29.654	12.2			24.371	11.687		1	0	1	0
37	19_Wrzb_le	38	29	1.31034	1	33.161								1	1	1	1
38	33_LMU_le	29	25.5	1.13725	1	40.092								1	0	0	1
39	10_Wrzb_ri	50.5	28	1.80357	1	26.576	52.783		0.501		3.293	52.678		1	1	1	0
40	15_Wrzb_ri	53	26.622	1.99083	1	22.146								1	1	1	0
41	19_LMU_ri	32	28	1.14286	1	41.536	6.445		6.194	1.563		0.85		1	1	0	0
42	02_LMU_ri	37	24	1.54167	1	21.423	23.035	3.8			18.852	12.68		1	1	1	1
43	31_LMU_ri	31.224	30.088	1.03776	1	47.991	5.804	4.75			1.907	2.736		1	0	1	0
44	04_LMU_ri	56	31.865	1.75741	1	11.582								1	1	1	1
45	27_LMU_le	28	26.5	1.0566	1	46.648	5.387		2.412	0.638		4.775		1	1	0	0
46	01_Wrzb_ri	26.001	25.384	1.02431	1	41.372								1	1	1	1
47	06_LMU_ri	48.031	25.224	1.90418	1	16.382								1	1	1	1
48	14_Wrzb_ri	40	31	1.29032	1	27.541	24.578	18			6.169	15.557		1	1	1	1
49	39_LMU_ri	32.505	29	1.12086	1	16.847	32.35	20.192		17.432		18.301		1	1	0	1
50	40_LMU_le	37.11	29.557	1.25554	1	21.832	19.765		8.244		14.007	11.248		1	1	1	0
Mean				1.30864		31.9112	25.1376	9.41919	8.45444	4.07591	13.043	19.141	3.561
Std				0.234238		11.4804	13.167	6.35677	9.80121	5.42662	9.53435	11.887	1.71686
