# Supplementary material for: Quantitative assessment of acetabular bone defects: A study of 50 computed tomography data sets
Source: PLoS One. 2019 Oct 17;14(10):e0222511. doi: 10.1371/journal.pone.0222511 (PMC6797127; doi:10.1371/journal.pone.0222511)
Supplement: S3 File — In both sheets, in columns A and B, the case numbers (1 to 50) alongside with the internal identifiers are listed. In sheet 1, columns C to G, the bone volume loss (ml) in each sector, and in total is listed in ml for each case. Below the single measurement values, the median, 25th percentile, 75th percentile, minimum and maximum values are shown, as well as the mean and standard deviations for bone volume loss each sector and for overall bone volume loss. In sheet 2, columns C to F, the bone volume loss (%) in each sector relative to the native bone volume in each sector is listed. Below the single measurement values, the median, 25th percentile, 75th percentile, minimum and maximum values are shown, as well as the mean and standard deviations for bone volume loss in each sector. Columns H to R show the defect groups based on the applied thresholds 25% (Cranial, Anterior, Medial) and 15% (Posterior) which were present within the 50 analyzed cases. An “x” indicates the group the corresponding case is assigned to. The number of cases in each group is shown below. (XLSX) [file pone.0222511.s003.xlsx]

## Sheet: Bone_Vol_Loss_Absolute
Bone volume loss (absolute values in ml)
		Bone volume loss, absolute values (ml)
	Hemipelvis	Cranial	Anterior	Posterior	Medial	Total
1	01_Rizz_ri	6.91438	3.50718	6.17454	10.7781	27.3742
2	01_Rizz_le	7.64721	7.76169	2.48196	7.69538	25.5862
3	01_Ll_le	38.9035	10.9176	12.695	18.7313	81.2474
4	01_LMU_le	33.3524	1.85512	24.7293	22.1108	82.0477
5	02_LMU_le	16.4515	7.64204	12.0498	10.2986	46.4418
6	02_Rizz_le	29.4235	5.1044	20.6778	19.3512	74.5569
7	03_LMU_le	34.7483	5.82225	4.77186	8.05667	53.3991
8	03_LMU_ri	44.4266	10.4406	19.1552	22.0661	96.0884
9	03_Rizz_le	27.4149	7.26779	4.91686	6.81182	46.4113
10	03_Rizz_ri	27.1063	6.89224	10.859	13.2309	58.0884
11	04_Ll_le	29.7573	5.05344	22.3057	20.5796	77.6961
12	04_Rizz_le	16.9696	5.33241	6.87013	11.5687	40.7409
13	06_LMU_le	7.37268	5.56616	14.8279	13.7397	41.5064
14	07_Ll_ri	17.7639	6.02177	6.34237	11.4377	41.5658
15	07_LMU_le	20.0028	8.65584	16.735	17.6427	63.0364
16	07_Rizz_le	12.529	1.79185	1.92959	2.75402	19.0045
17	07_Wrzb_le	19.1104	4.96083	19.9508	20.452	64.474
18	08_Wrzb_le	7.23235	2.76947	15.5669	9.78173	35.3505
19	09_LMU_ri	4.78585	6.35108	3.85676	12.2015	27.1952
20	10_Rizz_ri	8.24765	7.18877	3.90108	9.58057	28.9181
21	11_Wrzb_le	31.3708	5.21554	5.75171	11.3364	53.6745
22	12_LMU_ri	11.1244	14.6987	8.31072	16.5407	50.6745
23	12_Wrzb_le	15.5124	13.8662	19.1944	18.1215	66.6945
24	13_LMU_ri	27.71	6.87836	28.3553	19.1435	82.0871
25	14_LMU_le	27.0036	7.82328	8.6924	22.3162	65.8354
26	17_LMU_ri	25.0464	14.6286	18.3701	22.0159	80.061
27	20_LMU_ri	25.984	5.1593	3.51663	7.26717	41.9271
28	26_LMU_le	6.48265	5.38636	33.2349	9.35198	54.4559
29	28_LMU_ri	14.6865	3.60761	5.63614	19.6931	43.6234
30	30_LMU_le	29.7972	13.0624	23.2523	12.9868	79.0988
31	31_LMU_le	25.2645	13.3267	29.6939	20.0556	88.3408
32	32_LMU_ri	5.26746	7.43363	3.0166	13.5498	29.2674
33	37_LMU_ri	36.6585	14.7856	22.728	19.3372	93.5093
34	38_LMU_le	32.0069	10.0379	20.1981	14.5212	76.7641
35	17_Wrzb_ri	15.6499	5.54033	18.0937	14.9561	54.2401
36	36_LMU_ri	12.3382	1.45137	23.5874	17.0516	54.4285
37	19_Wrzb_le	45.989	12.913	18.6396	26.3894	103.931
38	33_LMU	8.06248	5.08678	9.85074	12.872	35.872
39	10_Wrzb_ri	34.7364	3.80813	4.0198	7.36007	49.9244
40	15_Wrzb_ri	30.3694	6.64831	3.1765	3.31588	43.5101
41	19_LMU_ri	15.617	10.8908	9.28676	5.82535	41.6199
42	02_LMU_ri	25.4134	9.18358	18.788	14.4198	67.8048
43	31_LMU_ri	9.80748	4.4115	12.3227	14.0812	40.6229
44	04_LMU_ri	37.3734	10.5423	21.079	19.3266	88.3214
45	27_LMU_le	5.21718	6.98044	8.38035	5.78885	26.3668
46	01_Wrzb_ri	7.13572	6.46862	11.5358	9.55028	34.6905
47	06_LMU_ri	23.2245	5.37732	20.8167	18.2233	67.6418
48	14_Wrzb_ri	23.6874	12.8143	28.2087	24.2693	88.9797
49	39_LMU_ri	20.9507	11.9052	3.8574	16.4065	53.1199
50	40_LMU_le	18.3446	4.43365	15.4512	15.2527	53.4821
Min		4.78585	1.45137	1.92959	2.75402	19.0045
25th percentile		10.7952	5.1	5.72282	9.73144	41.315
Median		20.4768	6.76334	12.5089	14.2505	53.5783
75th percentile		29.7673	10.466	20.318	19.3293	76.9971
Max		45.989	14.7856	33.2349	26.3894	103.931
Mean		21.1598	7.50537	13.7569	14.4039	56.826
Std		11.1838	3.62047	8.43492	5.70677	21.6003

## Sheet: Bone_Vol_Loss_Relative
Bone volume loss (relative values in %)
		Bone volume loss relative to native volume (%)					Defect groups based on thresholds (Sector Cranial, Anterior, Medial > 25%; Sector Posterior > 15%)
								Concerned sectors
	Hemipelvis	Cranial	Anterior	Posterior	Medial			All	Cranial-Anterior-Posterior	Cranial-Anterior-Medial	Cranial-Posterior-Medial	Anterior-Posterior-Medial	Cranial-Anterior	Cranial-Medial	Anterior-Medial	Posterior-Medial	Cranial
1	01_Rizz_ri	22.9595	36.4371	27.58	78.8899							x
2	01_Rizz_le	23.7317	75.6804	10.4953	62.2967										x
3	01_Ll_le	90.5747	66.5079	39.9273	99.9752			x
4	01_LMU_le	67.5288	9.03994	68.2505	95.3158						x
5	02_LMU_le	49.6293	64.375	45.8224	72.0094			x
6	02_Rizz_le	63.6511	27.1599	60.7835	98.3671			x
7	03_LMU_le	73.2814	31.1291	13.8394	37.1768					x
8	03_LMU_ri	97.6915	54.9038	54.8148	97.8496			x
9	03_Rizz_le	69.5226	47.5232	18.7863	59.2868			x
10	03_Rizz_ri	72.8361	49.0786	38.787	93.3883			x
11	04_Ll_le	54.3046	25.1847	52.3994	77.6777			x
12	04_Rizz_le	27.2384	18.5183	15.452	36.0718						x
13	06_LMU_le	21.2126	45.6331	65.6843	80.2021							x
14	07_Ll_ri	38.5813	31.4269	18.0344	46.7835			x
15	07_LMU_le	47.6734	49.4017	57.0535	95.5213			x
16	07_Rizz_le	33.9588	12.1557	6.96067	14.6355												x
17	07_Wrzb_le	25.2445	15.4235	41.2905	76.2099						x
18	08_Wrzb_le	16.2926	13.823	45.9683	42.7402											x
19	09_LMU_ri	13.9301	48.6563	16.553	88.3463							x
20	10_Rizz_ri	13.2278	28.2682	8.67972	30.6557										x
21	11_Wrzb_le	79.8311	29.2995	19.8376	71.5758			x
22	12_LMU_ri	19.9572	62.9165	19.9295	58.2049							x
23	12_Wrzb_le	31.7812	65.1656	53.709	73.4947			x
24	13_LMU_ri	46.2839	26.368	59.8653	63.8978			x
25	14_LMU_le	49.144	35.2147	21.9659	95.952			x
26	17_LMU_ri	40.0768	60.6274	42.5697	79.7696			x
27	20_LMU_ri	64.1632	33.0056	12.1236	38.4193					x
28	26_LMU_le	10.7265	24.1805	79.4621	51.8821											x
29	28_LMU_ri	26.7294	15.5566	15.2506	70.2889						x
30	30_LMU_le	74.2118	73.7019	79.8744	64.0332			x
31	31_LMU_le	38.5204	49.4117	60.3513	60.4725			x
32	32_LMU_ri	10.7709	41.8136	8.28052	69.8763										x
33	37_LMU_ri	86.7993	87.772	71.3968	94.9293			x
34	38_LMU_le	84.3878	72.2939	74.5166	100			x
35	17_Wrzb_ri	31.3623	28.897	47.8798	61			x
36	36_LMU_ri	30.9365	8.70406	74.1403	77.5649						x
37	19_Wrzb_le	71.4169	49.2452	42.1897	98.6159			x
38	33_LMU	20.0354	31.6666	33.3632	72.0515							x
39	10_Wrzb_ri	86.4075	23.5093	14.0459	35.5453									x
40	15_Wrzb_ri	69.7305	35.4305	8.37293	15.4686								x
41	19_LMU_ri	28.0592	42.4468	23.0113	18.0658				x
42	02_LMU_ri	84.0632	71.6815	76.4792	97.6095			x
43	31_LMU_ri	15.2867	16.292	25.0975	39.2343											x
44	04_LMU_ri	97.9411	63.8987	71.4994	95.2642			x
45	27_LMU_le	12.958	53.6852	28.2632	39.3756							x
46	01_Wrzb_ri	25.1299	60.4206	53.8972	77.7949			x
47	06_LMU_ri	67.5449	45.0655	93.53	95.3531			x
48	14_Wrzb_ri	59.6547	69.2787	88.9506	100			x
49	39_LMU_ri	49.2088	72.1108	12.8368	86.3466					x
50	40_LMU_le	44.3484	29.8843	50.8724	74.3499			x
							N	26	1	3	5	6	1	1	3	3	1
							Check sum	50
Min		10.7265	8.70406	6.96067	14.6355
25th percentile		24.7803	26.9619	17.6641	50.6075
Median		45.3161	42.1302	41.7401	72.7731
75th percentile		70.1521	61.1996	60.4594	95.013
Max		97.9411	87.772	93.53	100
Mean		47.6108	42.5974	41.4145	69.1967
Std		26.2728	20.5192	24.9422	24.7981
