# Supplementary material for: Quantitative assessment of acetabular bone defects: A study of 50 computed tomography data sets
Source: PLoS One. 2019 Oct 17;14(10):e0222511. doi: 10.1371/journal.pone.0222511 (PMC6797127; doi:10.1371/journal.pone.0222511)
Supplement: S5 File — In all sheets, in columns A and B, the case numbers (1 to 50) alongside with the internal identifiers are listed. In sheet 1 column C, the ovality for each case is listed. Below the single measurement values, the median, 25th percentile, 75th percentile, minimum and maximum values are shown, as well as the mean and standard deviations. In sheet 2, column C, the LCE angle is listed for each case. Below the single measurement values, the median, 25th percentile, 75th percentile, minimum and maximum values are shown, as well as the mean and standard deviations. In columns F to H, the assignment to the groups according to Wiberg et al. is shown. In sheet 3, implant migration is listed as total distance in mm (column C) and distance in medial-lateral, anterior-posterior, cranial-distal direction (column D to I). Below the single measurement values, the median, 25th percentile, 75th percentile, minimum and maximum values, as well as the mean and standard deviations are shown. In column J, the implant type is listed and in column K to M, the predominant directions based on the values in column D to I are listed. Based on the predominant migration direction, the defect cases could be grouped, as shown in column L and M. In sheet 4, column C to F, the existence of wall defects in each sector is indicated by “1”, whereas an intact wall is indicated by “0”. Based on the combination of concerned sectors, the cases could be grouped (column G). A description of the groups and the number of cases in each group is shown in columns I to K. (XLSX) [file pone.0222511.s005.xlsx]

## Sheet: Ovality
Ovality
	Hemipelvis	Ovality
1	01_Rizz_ri	1.21759
2	01_Rizz_le	1.38095
3	01_Ll_le	1.191
4	01_LMU_le	1.46044
5	02_LMU_le	1.31771
6	02_Rizz_le	1.20193
7	03_LMU_le	1.36364
8	03_LMU_ri	1.46757
9	03_Rizz_le	1.0669
10	03_Rizz_ri	1.36
11	04_Ll_le	1.35484
12	04_Rizz_le	1.15847
13	06_LMU_le	1.37367
14	07_Ll_ri	1.10345
15	07_LMU_le	1.09091
16	07_Rizz_le	1.27277
17	07_Wrzb_le	1.15245
18	08_Wrzb_le	1.31569
19	09_LMU_ri	1.04185
20	10_Rizz_ri	1.05223
21	11_Wrzb_le	1.61047
22	12_LMU_ri	1.12987
23	12_Wrzb_le	1.24862
24	13_LMU_ri	1.25224
25	14_LMU_le	1.18966
26	17_LMU_ri	1.09087
27	20_LMU_ri	1.62192
28	26_LMU_le	1.03295
29	28_LMU_ri	1.19853
30	30_LMU_le	1.59813
31	31_LMU_le	1.42424
32	32_LMU_ri	1.17043
33	37_LMU_ri	1.65468
34	38_LMU_le	1.2605
35	17_Wrzb_ri	1.25926
36	36_LMU_ri	1.37191
37	19_Wrzb_le	1.31034
38	33_LMU_le	1.13725
39	10_Wrzb_ri	1.80357
40	15_Wrzb_ri	1.99083
41	19_LMU_ri	1.14286
42	02_LMU_ri	1.54167
43	31_LMU_ri	1.03776
44	04_LMU_ri	1.75741
45	27_LMU_le	1.0566
46	01_Wrzb_ri	1.02431
47	06_LMU_ri	1.90418
48	14_Wrzb_ri	1.29032
49	39_LMU_ri	1.12086
50	40_LMU_le	1.25554
Min		1.02431
25th percentile		1.13541
Median		1.2574
75th percentile		1.39177
Max		1.99083
Mean		1.30864
Std		0.234238

## Sheet: LCE Angle
LCE angle [°]
	Hemipelvis	LCE angle [°]			Groups according to Wiberg		N
1	01_Rizz_ri	44.995			LCE-angle < 20°		6
2	01_Rizz_le	31.259			20° ≤ LCE-angle ≤ 25°		11
3	01_Ll_le	23.267			25° < LCE-angle ≤ 39°		18
4	01_LMU_le	20.346			LCE-angle > 39°		15
5	02_LMU_le	39.623				Check sum	50
6	02_Rizz_le	20.716
7	03_LMU_le	20.712
8	03_LMU_ri	23.488
9	03_Rizz_le	29.56
10	03_Rizz_ri	43.15
11	04_Ll_le	19.542
12	04_Rizz_le	39.915
13	06_LMU_le	48.682
14	07_Ll_ri	20.736
15	07_LMU_le	11.968
16	07_Rizz_le	38.826
17	07_Wrzb_le	45.843
18	08_Wrzb_le	27.855
19	09_LMU_ri	36.145
20	10_Rizz_ri	44.597
21	11_Wrzb_le	36.634
22	12_LMU_ri	37.005
23	12_Wrzb_le	38.796
24	13_LMU_ri	28.065
25	14_LMU_le	37.854
26	17_LMU_ri	19.29
27	20_LMU_ri	29.136
28	26_LMU_le	63.028
29	28_LMU_ri	26.249
30	30_LMU_le	21.54
31	31_LMU_le	34.42
32	32_LMU_ri	53.051
33	37_LMU_ri	34.169
34	38_LMU_le	26.023
35	17_Wrzb_ri	21.223
36	36_LMU_ri	42.723
37	19_Wrzb_le	33.161
38	33_LMU_le	40.092
39	10_Wrzb_ri	26.576
40	15_Wrzb_ri	22.146
41	19_LMU_ri	41.536
42	02_LMU_ri	21.423
43	31_LMU_ri	47.991
44	04_LMU_ri	11.582
45	27_LMU_le	46.648
46	01_Wrzb_ri	41.372
47	06_LMU_ri	16.382
48	14_Wrzb_ri	27.541
49	39_LMU_ri	16.847
50	40_LMU_le	21.832
Min		11.582
25th percentile		21.5107
Median		30.4095
75th percentile		40.412
Max		63.028
Mean		31.9112
Std		11.4804

## Sheet: Implant Migration
Implant migration
		Implant migration
		Total Distance (mm)	Direction (mm)
	Hemipelvis		Medial	Lateral	Anterior	Posterior	Cranial	Distal	Implant type	Predominant direction
1	01_Rizz_ri	13.124	9.065			5.866	7.461		Muller Ring with PE-cup	Medial	Groups based predominant migration directon
2	01_Rizz_le	32.764	20.274		9.667		23.854		Muller Ring with PE-cup	Cranial	Direction	N
3	01_Ll_le	26.133	6.437		0.709		25.318		Cage with PE-Cup	Cranial	Medial	7
4	01_LMU_le	51.726		12.905		37.902	32.749		Cage with PE-Cup	Posterior	Lateral	4
5	02_LMU_le	27.39		1.229		20.942	17.611		Press-fit cup	Posterior	Anterior	0
6	02_Rizz_le	24.352	5.272			13.153	19.804		Press-fit cup	Cranial	Posterior	7
7	03_LMU_le	38.376		12.897		3.41	35.983		Cage with PE-Cup	Cranial	Cranial	14
8	03_LMU_ri	37.315	3.994			19.926	31.295		Muller Ring with PE-cup	Cranial	Distal	0
9	03_Rizz_le	27.213		6.797	7.89		25.142		Press-fit cup	Cranial	Check sum	32
11	04_Ll_le	53.532		39.601		13.64	33.339		Muller Ring with metal cup	Lateral
12	04_Rizz_le	17.325		2.374		5.256	16.337		Press-fit cup	Cranial
14	07_Ll_ri	12.401		3.393	2.185		11.726		Press-fit cup	Cranial
15	07_LMU_le	31.487		19.488		17.524	17.451		Screw cup	Lateral
17	07_Wrzb_le	15.856	0.563			9.307	12.825		Press-fit cup + plate	Cranial
18	08_Wrzb_le	26.549	0.906			25.209	8.281		Screw cup	Posterior
19	09_LMU_ri	14.441	10.62			1.684	9.64		Screw cup	Medial
21	11_Wrzb_le	37.016		2.01	0.968		36.949		Screw cup	Cranial
23	12_Wrzb_le	9.001	8.688		0.112			2.347	Screw cup	Medial
24	13_LMU_ri	19.353		1.872		11.186	15.681		Cage with PE-Cup	Cranial
25	14_LMU_le	36.181	11.61		2.793		34.154		Screw cup	Cranial
28	26_LMU_le	8.738		6.959		2.262		4.775	Screw cup	Lateral
32	32_LMU_ri	18.226	14.336		0.878		11.221		Press-fit cup	Medial
35	17_Wrzb_ri	26.102		8.395		18.038	16.896		Cage with metal cup	Posterior
36	36_LMU_ri	29.654	12.2			24.371	11.687		Press-fit cup	Posterior
39	10_Wrzb_ri	52.783		0.501		3.293	52.678		Press-fit cup	Cranial
41	19_LMU_ri	6.445		6.194	1.563		0.85		Screw cup	Lateral
42	02_LMU_ri	23.035	3.8			18.852	12.68		Press-fit cup	Posterior
43	31_LMU_ri	5.804	4.75			1.907	2.736		Press-fit cup	Medial
45	27_LMU_le	5.387		2.412	0.638		4.775		Screw cup	Cranial
48	14_Wrzb_ri	24.578	18			6.169	15.557		Press-fit cup	Medial
49	39_LMU_ri	32.35	20.192		17.432		18.301		Press-fit cup	Medial
50	40_LMU_le	19.765		8.244		14.007	11.248		Cage with metal cup	Posterior
Min		5.387	0.563	0.501	0.112	1.684	0.85	2.347
25th percentile		14.7948	4.183	2.101	0.709	4.333	11.2412
Median		25.34	8.8765	6.4955	1.563	13.153	16.6165	3.561
75th percentile		32.6605	13.802	11.7715	7.89	19.389	26.8123
Max		53.532	20.274	39.601	17.432	37.902	52.678	4.775
Mean		25.1376	9.41919	8.45444	4.07591	13.043	19.141	3.561
Std		13.167	6.35677	9.80121	5.42662	9.53435	11.887	1.71686

## Sheet: Wall Defects
Wall defects
		Wall defect
		0 = intact ; 1 = defect
	Hemipelvis	Cranial	Anterior	Posterior	Medial	Group identifier
1	01_Rizz_ri	1	1	1	1	A
2	01_Rizz_le	1	1	0	1	E		Group		N
3	01_Ll_le	1	1	1	0	C		A	All	17
4	01_LMU_le	1	0	1	1	D		B	Cranial + Anterior	3
5	02_LMU_le	1	1	1	0	C		C	Cranial + Anterior + Posterior	12
6	02_Rizz_le	1	1	1	1	A		D	Cranial + Posterior + Medial	3
7	03_LMU_le	1	1	1	0	C		E	Cranial + Anterior + Medial	4
8	03_LMU_ri	1	1	1	0	C		F	Cranial + Posterior	6
9	03_Rizz_le	1	1	0	1	E		G	Cranial	1
10	03_Rizz_ri	1	1	1	1	A		H	Anterior + Medial	2
11	04_Ll_le	1	0	1	1	D		I	Cranial + Medial	1
12	04_Rizz_le	1	0	1	0	F		Zero	None	1
13	06_LMU_le	1	1	1	1	A			Check sum	50
14	07_Ll_ri	1	1	1	0	C
15	07_LMU_le	1	1	1	1	A
16	07_Rizz_le	1	0	0	0	G
17	07_Wrzb_le	1	0	1	0	F
18	08_Wrzb_le	1	0	1	1	D
19	09_LMU_ri	0	1	0	1	H
20	10_Rizz_ri	0	0	0	0	Zero
21	11_Wrzb_le	1	1	1	1	A
22	12_LMU_ri	1	1	0	0	E
23	12_Wrzb_le	1	1	1	1	A
24	13_LMU_ri	1	1	1	0	C
25	14_LMU_le	1	1	1	1	A
26	17_LMU_ri	1	1	1	0	C
27	20_LMU_ri	1	1	0	0	B
28	26_LMU_le	1	1	1	1	A
29	28_LMU_ri	1	0	1	0	F
30	30_LMU_le	1	1	1	0	C
31	31_LMU_le	1	1	1	0	C
32	32_LMU_ri	0	1	0	1	H
33	37_LMU_ri	1	1	1	1	A
34	38_LMU_le	1	1	1	1	A
35	17_Wrzb_ri	1	0	1	0	F
36	36_LMU_ri	1	0	1	0	F
37	19_Wrzb_le	1	1	1	1	A
38	33_LMU_le	1	0	0	1	I
39	10_Wrzb_ri	1	1	1	0	C
40	15_Wrzb_ri	1	1	1	0	C
41	19_LMU_ri	1	1	0	0	B
42	02_LMU_ri	1	1	1	1	A
43	31_LMU_ri	1	0	1	0	F
44	04_LMU_ri	1	1	1	1	A
45	27_LMU_le	1	1	0	0	B
46	01_Wrzb_ri	1	1	1	1	A
47	06_LMU_ri	1	1	1	1	A
48	14_Wrzb_ri	1	1	1	1	A
49	39_LMU_ri	1	1	0	1	E
50	40_LMU_le	1	1	1	0	C
No. of specimens concerned		47	38	38	26
Groups		A	B	C	D	E	F	G	H	I	Zero
No. of specimens in group		17	3	12	3	4	6	1	2	1	1
