# Supplementary material for: Quantitative assessment of acetabular bone defects: A study of 50 computed tomography data sets
Source: PLoS One. 2019 Oct 17;14(10):e0222511. doi: 10.1371/journal.pone.0222511 (PMC6797127; doi:10.1371/journal.pone.0222511)
Supplement: S7 File — Variable 1 and Variable 2 represent the parameters and the table is sub-divided into the four sections absolute bone volume loss, relative bone volume loss, absolute new bone formation, and relative new bone formation. Statistical significance is indicated by a p-value < 0.05 in column D and description “TRUE” in column E (hypothesis). (XLS) [file pone.0222511.s007.xls]

## Sheet: Tabelle1
	Variable 1	Variable 2	p-value	hypothesis
Bone volume loss, absolute values	AbsVolLoss Cran	AbsVolLoss Ant	1.12465e-10	TRUE		Parameter abbreviations
	AbsVolLoss Cran	AbsVolLoss Post	0.000685769	TRUE		Abbreviation	Parameter
	AbsVolLoss Cran	AbsVolLoss Med	0.00313682	TRUE		AbsVolLoss Cran	Absolute bone volume loss Cranial
	AbsVolLoss Ant	AbsVolLoss Post	0.000505298	TRUE		AbsVolLoss Ant	Absolute bone volume loss Anterior
	AbsVolLoss Ant	AbsVolLoss Med	5.14194e-09	TRUE		AbsVolLoss Post	Absolute bone volume loss Posterior
	AbsVolLoss Post	AbsVolLoss Med	0.510307	FALSE		AbsVolLoss Med	Absolute bone volume loss Medial
Bone volume loss, relative values	RelVolLoss Cran	RelVolLoss Ant	0.462832	FALSE		RelVolLoss Cran	Relative bone volume loss Cranial
	RelVolLoss Cran	RelVolLoss Post	0.215924	FALSE		RelVolLoss Ant	Relative bone volume loss Anterior
	RelVolLoss Cran	RelVolLoss Med	9.95964e-05	TRUE		RelVolLoss Post	Relative bone volume loss Posterior
	RelVolLoss Ant	RelVolLoss Post	0.622078	FALSE		RelVolLoss Med	Relative bone volume loss Medial
	RelVolLoss Ant	RelVolLoss Med	3.96939e-07	TRUE		AbsBoneForm Cran	Absolute new bone formation Cranial
	RelVolLoss Post	RelVolLoss Med	1.07498e-06	TRUE		AbsBoneForm Ant	Absolute new bone formation Anterior
New bone formation, absolute values	AbsBoneForm Cran	AbsBoneForm Ant	0.0192604	TRUE		AbsBoneForm Post	Absolute new bone formation Posterior
	AbsBoneForm Cran	AbsBoneForm Post	0.860457	FALSE		AbsBoneForm Med	Absolute new bone formation Medial
	AbsBoneForm Cran	AbsBoneForm Med	1.83143e-05	TRUE		RelBoneForm Cran	Relative new bone formation Cranial
	AbsBoneForm Ant	AbsBoneForm Post	0.0323119	TRUE		RelBoneForm Ant	Relative new bone formation Anterior
	AbsBoneForm Ant	AbsBoneForm Med	0.0276247	TRUE		RelBoneForm Post	Relative new bone formation Posterior
	AbsBoneForm Post	AbsBoneForm Med	4.16059e-05	TRUE		RelBoneForm Med	Relative new bone formation Medial
New bone formation, relative values	RelBoneForm Cran	RelBoneForm Ant	0.000902194	TRUE
	RelBoneForm Cran	RelBoneForm Post	0.0231159	TRUE
	RelBoneForm Cran	RelBoneForm Med	0.671588	FALSE
	RelBoneForm Ant	RelBoneForm Post	0.0770166	FALSE
	RelBoneForm Ant	RelBoneForm Med	0.00925692	TRUE
	RelBoneForm Post	RelBoneForm Med	0.200966	FALSE
